# Supplementary material for: Probing the orientation and membrane permeation of rhodamine voltage reporters through molecular simulations and free energy calculations
Source: Royal Society of Chemistry journal article supplement (doi:10.1039/d4tb02670e), 2025-01-01
Supplement: d4tb02670e1.pdf [file d4tb02670e1.pdf]

## Supporting Information

**Table S1: Sampling ranges and window divisions in WTM-eABF calculations. The range of each window is given in Å, with the corresponding simulation time ( $\mu$ s) listed below.**

| Membrane | RhoVRs          | win01           | win02            | win03             | win04           | win05             |
|----------|-----------------|-----------------|------------------|-------------------|-----------------|-------------------|
| POPC     | RVR1            | [10, 55]<br>4.0 | [-15, 15]<br>5.6 | [-55, -10]<br>4.0 | -               | -                 |
|          | SRV1            | [10, 55]<br>4.0 | [-15, 15]<br>4.0 | [-55, -10]<br>2.9 | -               | -                 |
|          | RVR1-component  | [10, 43]<br>1.5 | [-15, 15]<br>2.0 | [-43, -10]<br>1.0 | -               | -                 |
|          | SRV1-component  | [10, 43]<br>1.5 | [-15, 15]<br>2.0 | [-43, -10]<br>0.5 | -               | -                 |
|          | RVR1-protonated | [10, 50]<br>1.5 | [-15, 15]<br>3.0 | [-50, -10]<br>1.7 | -               | -                 |
| POPC:CHL | RVR1            | [13, 43]<br>3.0 | [-15, 15]<br>5.6 | [-43, -13]<br>1.0 | [36, 50]<br>0.5 | [-50, -36]<br>0.5 |
|          | SRV1            | [41, 13]<br>1.5 | [-15, 15]<br>5.4 | [-41, -13]<br>1.0 | [36, 50]<br>0.5 | [-50, -36]<br>0.5 |
|          | RVR1-component  | [10, 43]<br>1.0 | [-15, 15]<br>1.0 | [-43, -10]<br>1.0 | -               | -                 |
|          | SRV1-component  | [10, 43]<br>1.0 | [-15, 15]<br>2.0 | [-43, -10]<br>1.0 | -               | -                 |
|          | RVR1-protonated | [10, 50]<br>2.0 | [-15, 15]<br>3.8 | [-50, -10]<br>1.8 | -               | -                 |

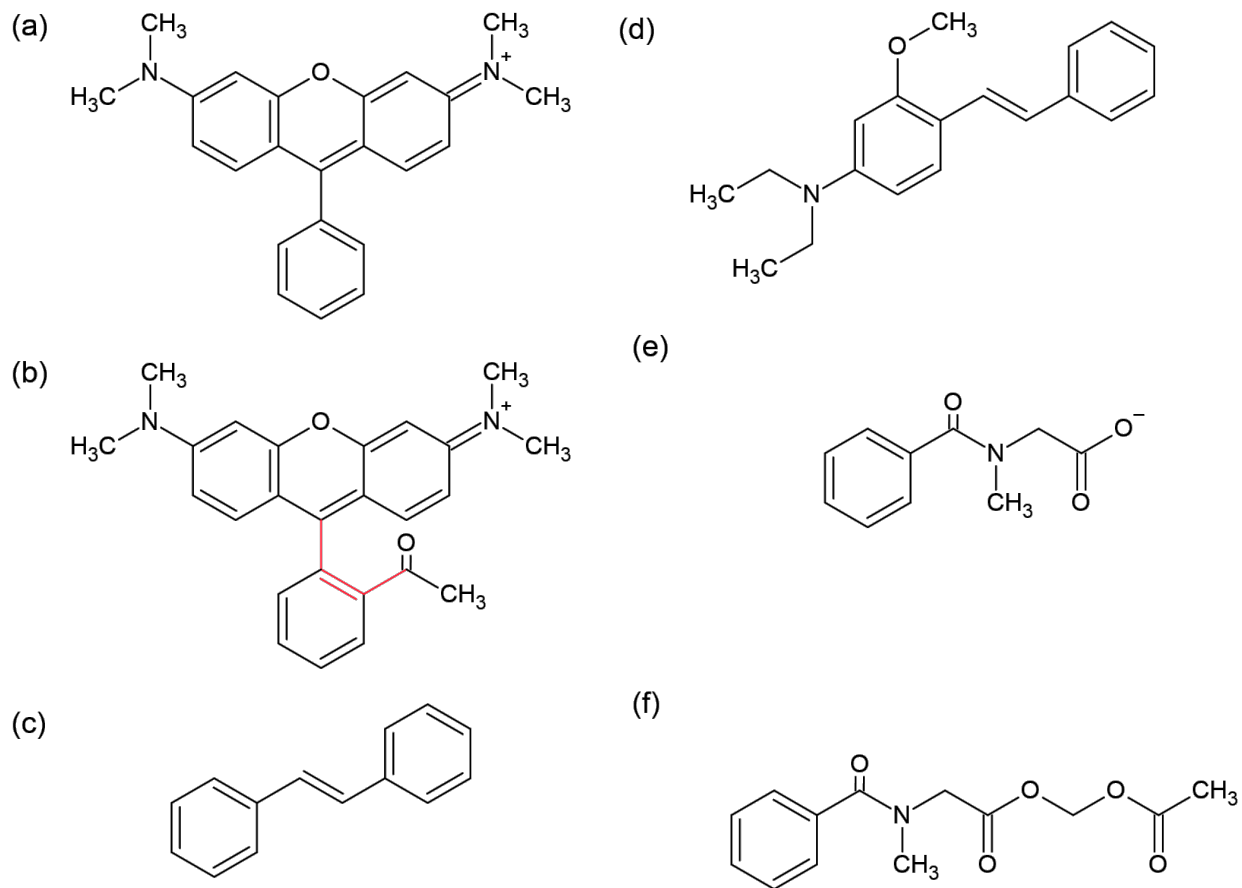

Figure S1: Fragments of RhoVRs employed in their force field parameter optimization (see Methods). Fragment (b) is used to parameterize a dihedral term (highlighted in red) not present in the other components.

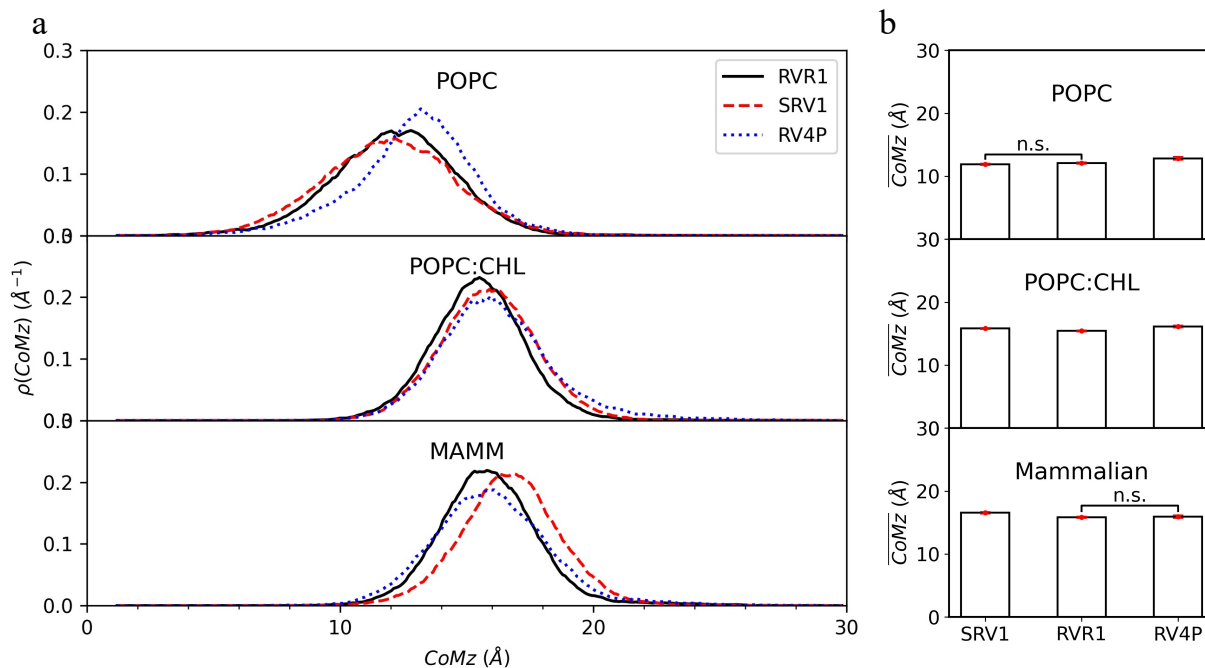

Figure S2: Center of mass of RhoVRs (CoMz) in equilibrium MD simulations. (a) Probability density distribution of CoMz ( $\rho(\text{CoMz})$ ). (b) Average CoMz ( $\overline{\text{CoMz}}$ ) of RhoVR dyes with the standard error of the mean shown as error bars. Statistical significance analyzed by Welch's  $t$ -test yields  $P < 0.05$  for all pairs of RhoVR dyes in a given lipid environment except for those labeled as *n.s.* (not significant).

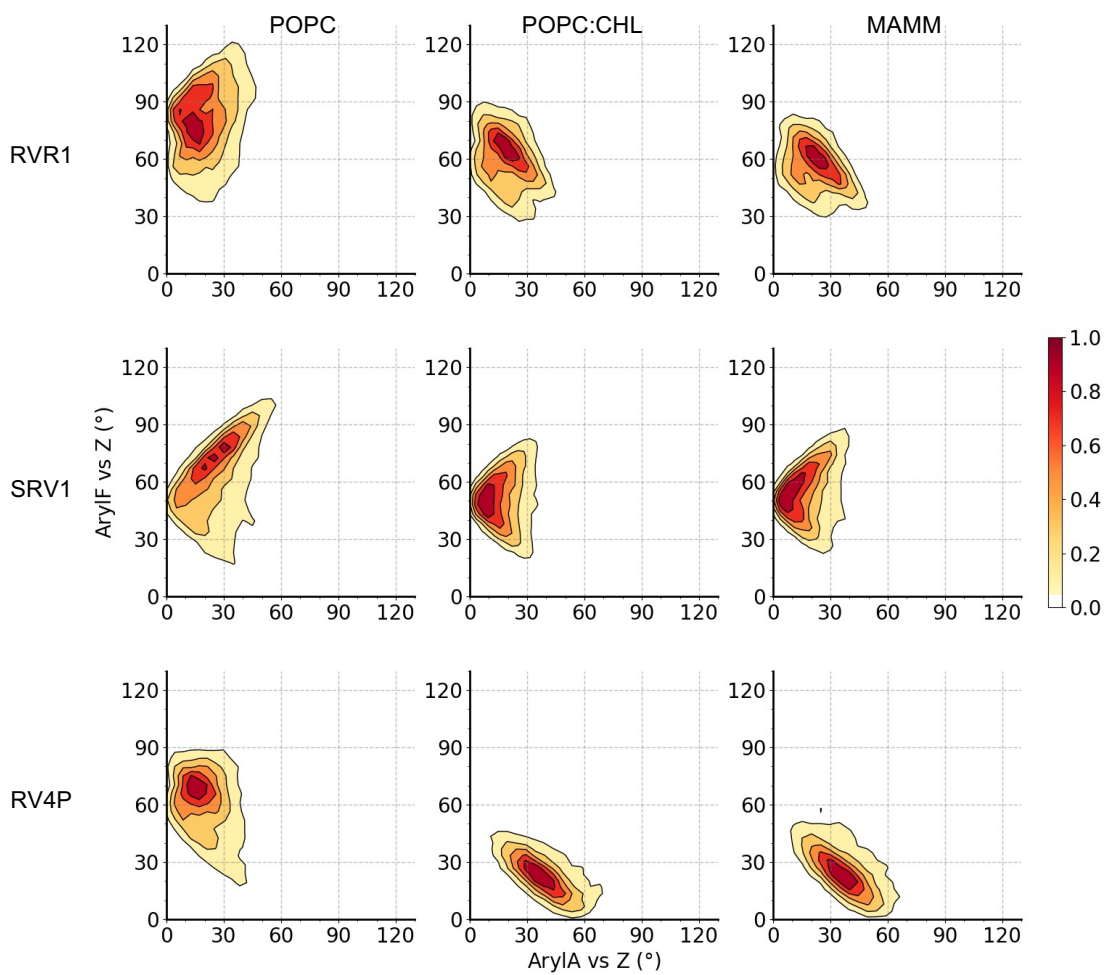

Figure S3: Contour plots depicting the tilt angles of  $\overrightarrow{ArylA}$  and  $\overrightarrow{ArylF}$  for RhoVR 1, RhoVR 1-4', and SPIRIT RhoVR 1 in equilibrium MD simulations.

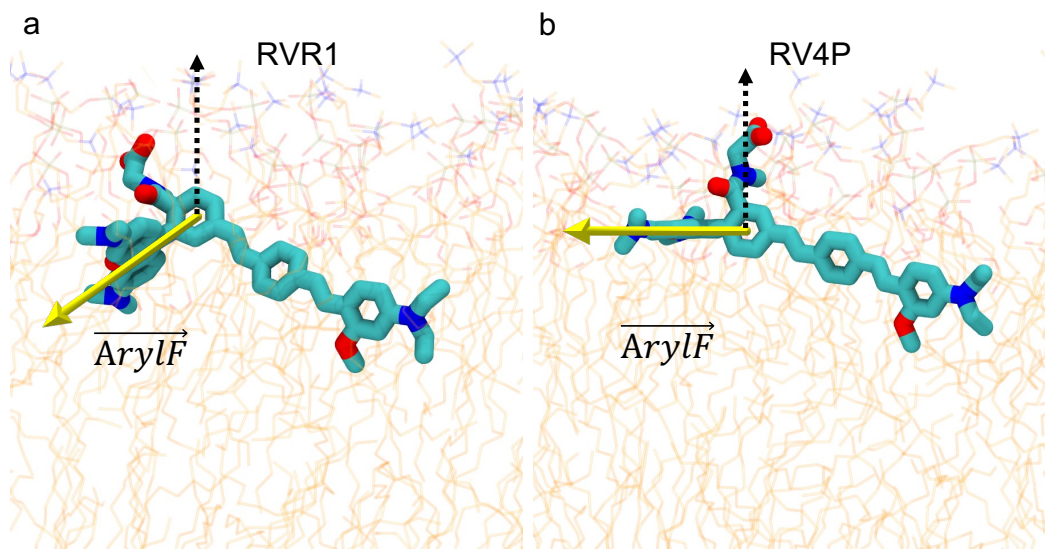

Figure S4: Representative snapshots from equilibrium MD simulations in pure POPC showing the tilting of  $\vec{ArylF}$  in RhoVR 1 (a) and RhoVR 1-4' (b). The tilt angles of  $\vec{ArylF}$  are  $\sim 120^\circ$  and  $\sim 90^\circ$  in (a) and (b), respectively.

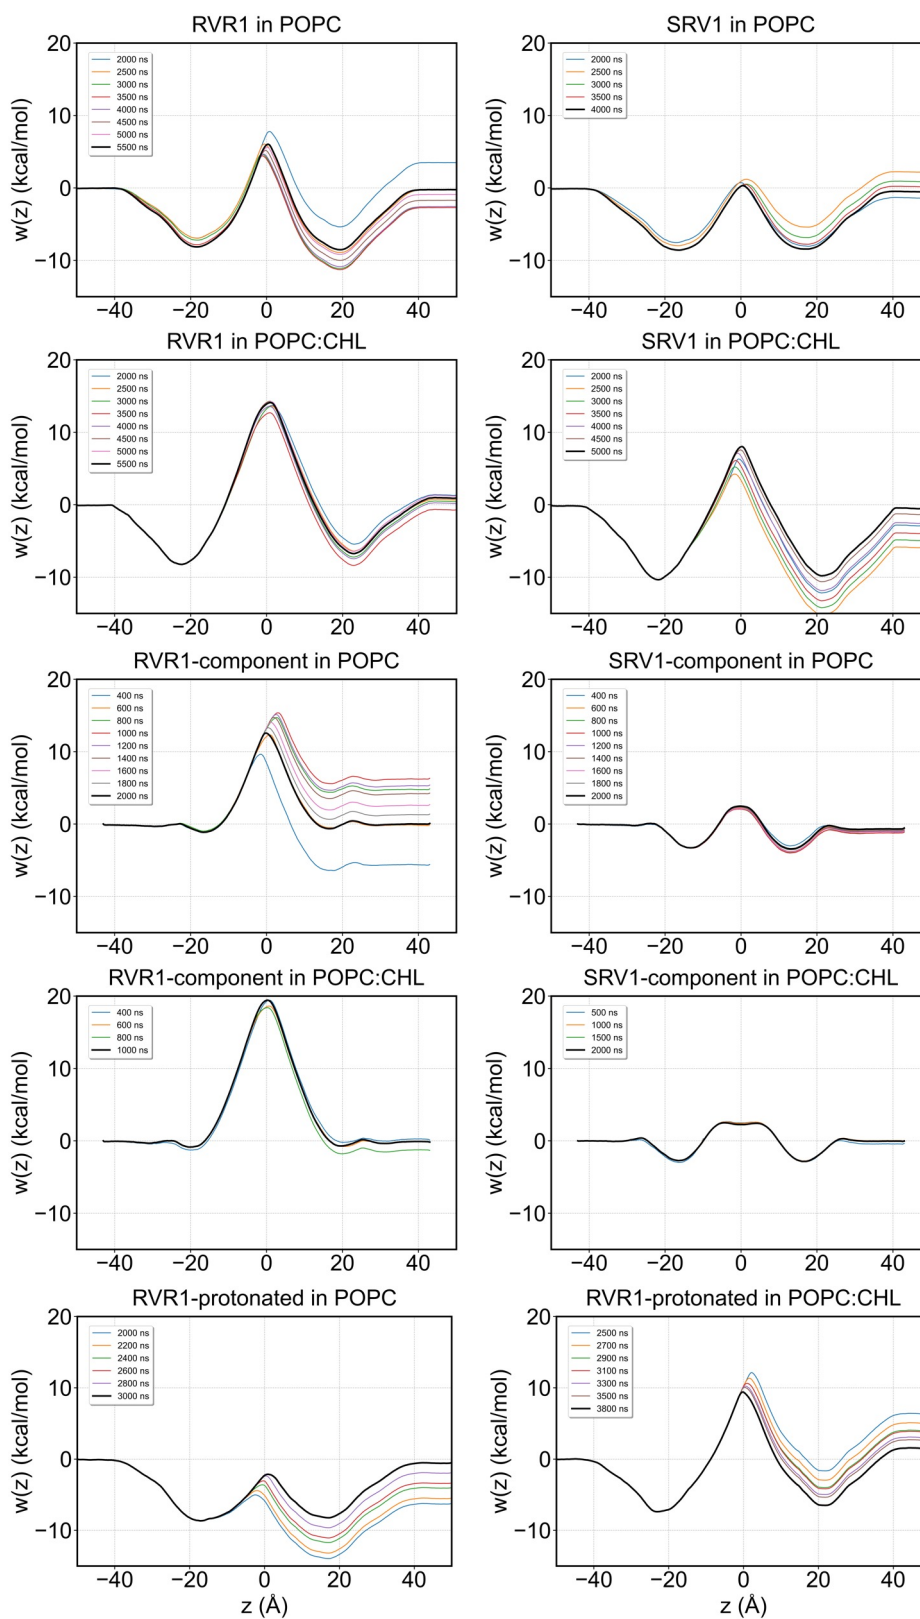

Figure S5: Convergence of unsymmetrized free-energy profiles of RhoVR 1, SPIRIT RhoVR 1 and their components in POPC and POPC:CHL bilayers. Each panel displays PMF profiles calculated at different simulation lengths (per window) with the final profile highlighted in black.

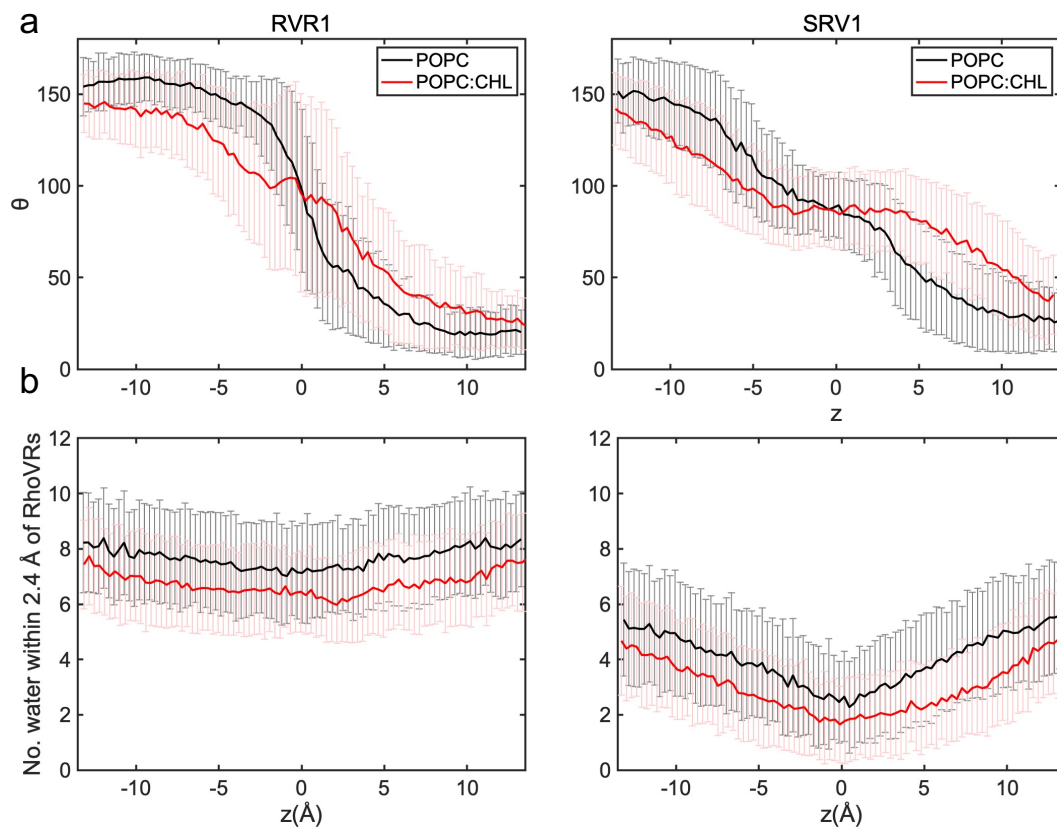

Figure S6: Orientation and solvation of RhoVRs during membrane permeation. (a) RhoVR Orientation as a function of dye location in a given membrane. (b) Average number of water within 2.4 Å of RhoVRs. All panels were computed using the WTM-eABF trajectories with  $-15 \text{ \AA} < z < 15 \text{ \AA}$ .



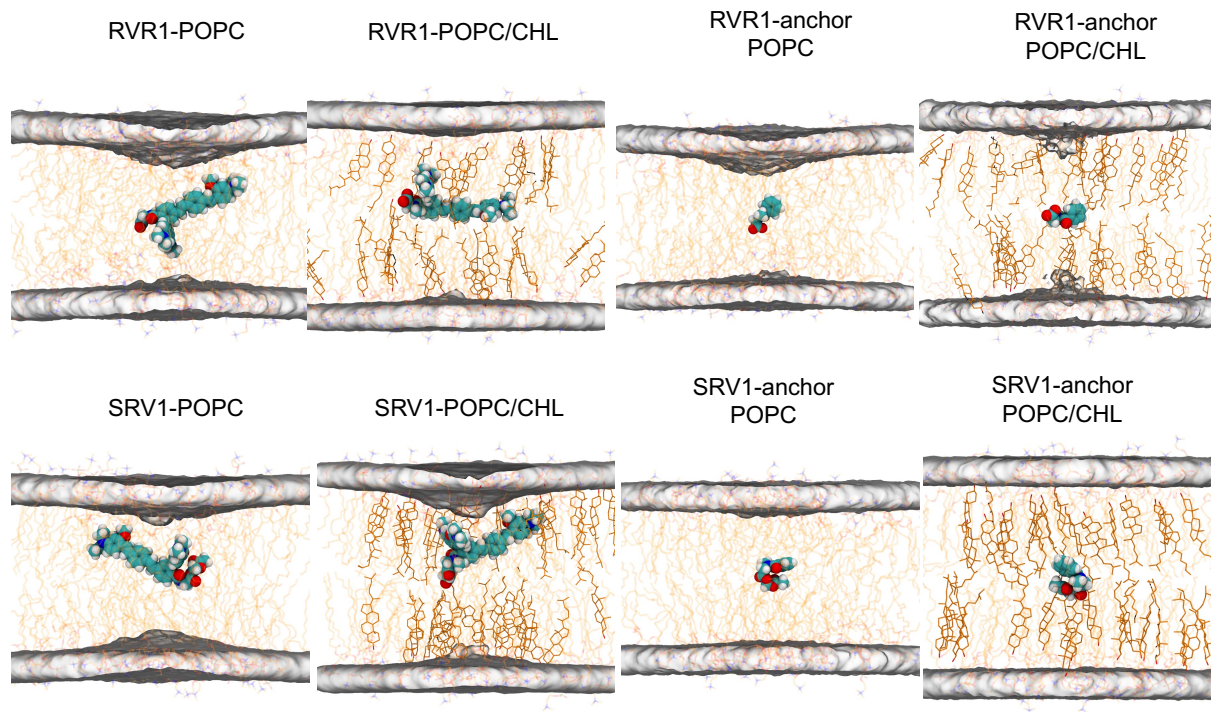

Figure S7: Occupancy of phosphorus atoms calculated from the WTM-eABF trajectories of a given permeant with  $-5 \text{ \AA} < z < 5 \text{ \AA}$ . The isosurfaces with an isovalue of 3% occupancy are superimposed with representative permeant conformations obtained from root mean square deviation (RMSD)-based clustering analysis.



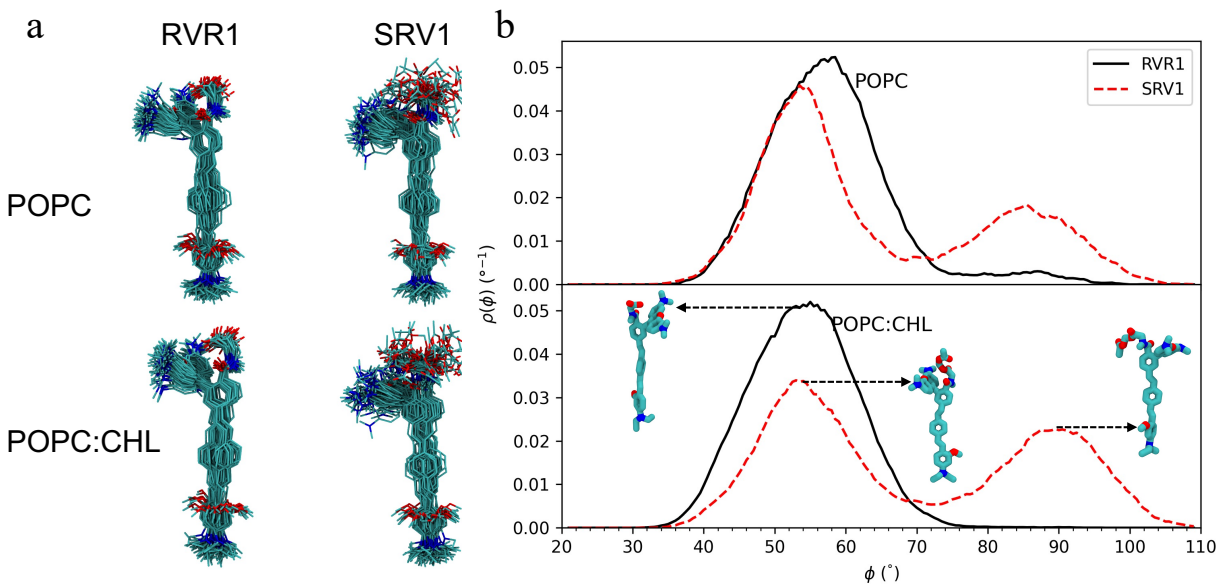

Figure S8: (a) Configurations of RhoVR 1 and SPIRIT RhoVR 1 extracted from WTM-eABF trajectories with  $-15 \text{ \AA} < z < 15 \text{ \AA}$ . Following alignment by minimizing RMSD, simulation snapshots are taken every 100 ns, resulting in approximately 50 superimposed configurations for each VSD. (b) Probability density distributions of the angle  $\varphi$  between  $\overrightarrow{ArylF}$  and  $\overrightarrow{ArylA}$  computed from the same trajectories analyzed in (a).
